# Supplementary material for: Socioeconomic inequalities and dyslipidaemia in adult population of the Ravansar Non-Communicable Disease Cohort Study: the role of sex and age
Source: PubMed Central journal article supplement — BMJ Open. 2024 Nov 4;14(11):e085035. doi: 10.1136/bmjopen-2024-085035 (PMC11535690; doi:10.1136/bmjopen-2024-085035), 2024-11-04
Supplement: bmjopen-14-11-s002.pdf [file bmjopen-14-11-s002.pdf]

**Supplementary Table 1: The association between dyslipidemia prevalence and its components with socioeconomic status using logistic regression**

| Variables            | SES    | Crude        |           | Model I      |           | Model II     |           |
|----------------------|--------|--------------|-----------|--------------|-----------|--------------|-----------|
|                      |        | OR           | 95% CI    | OR           | 95% CI    | OR           | 95% CI    |
| Dyslipidemia         | Poor   | 1            | -         | 1            | -         | 1            | -         |
|                      | Middle | 0.95         | 0.86-1.06 | 1.08         | 0.96-1.20 | 0.92         | 0.81-1.03 |
|                      | Rich   | 0.92         | 0.82-1.03 | <b>1.16*</b> | 1.03-1.31 | 0.91         | 0.80-1.04 |
| Hypercholesterolemia | Poor   | 1            | -         | 1            | -         | 1            | -         |
|                      | Middle | <b>0.69*</b> | 0.62-0.76 | <b>0.78*</b> | 0.70-0.87 | <b>0.74*</b> | 0.66-0.83 |
|                      | Rich   | <b>0.62*</b> | 0.56-0.69 | <b>0.80*</b> | 0.71-0.90 | <b>0.75*</b> | 0.66-0.84 |
| Hypertriglyceridemia | Poor   | 1            | -         | 1            | -         | 1            | -         |
|                      | Middle | 1.04         | 0.94-1.16 | 1.00         | 0.89-1.11 | <b>0.87*</b> | 0.78-0.98 |
|                      | Rich   | <b>1.16*</b> | 1.04-1.29 | 1.05         | 0.93-1.17 | <b>0.84*</b> | 0.74-0.95 |
| Hyper-LDL            | Poor   | 1            | -         | 1            | -         | 1            | -         |
|                      | Middle | <b>0.75*</b> | 0.67-0.83 | <b>0.83*</b> | 0.75-0.93 | <b>0.80*</b> | 0.71-0.89 |
|                      | Rich   | <b>0.66*</b> | 0.59-0.73 | <b>0.81*</b> | 0.72-0.92 | <b>0.76*</b> | 0.67-0.87 |
| Hypo-HDL             | Poor   | 1            | -         | 1            | -         | 1            | -         |
|                      | Middle | <b>1.19*</b> | 1.08-1.31 | <b>1.31*</b> | 1.18-1.45 | <b>1.18*</b> | 1.06-1.30 |
|                      | Rich   | <b>1.13*</b> | 1.03-1.25 | <b>1.39*</b> | 1.25-1.55 | <b>1.17*</b> | 1.04-1.31 |

**Model I:** Adjusted for sex and age; **Model II:** Adjusted for sex, age, BMI, WHR, physical activity, smoking status, alcohol consumption, and comorbidities; **SES:** Socioeconomic Status; **OR=Odds Ratio; CI=Confidence Interval**  
 \* P<0.05
